# Supplementary material for: The effect of different sowing dates on dry matter and nitrogen dynamics for winter wheat: an experimental simulation study
Source: PeerJ. 2021 Aug 10;9:e11700. doi: 10.7717/peerj.11700 (PMC8759384; doi:10.7717/peerj.11700)
Supplement: Supplemental Information 1 [file peerj-09-11700-s001.xlsx]

## Sheet: Part 1 
2018.10-2019.05 Weather conditions									2019.10-2020.05 Weather conditions							2018-2019 Growth period
Date	Precipitation (mm)	Average temperature (℃）	Max-temperature (℃)	Min-temperature (℃)	Daily sunshine hour (h)	Realtive humidity			Date	Precipitation (mm)	Average temperature (℃）	Max-temperature (℃)	Min-temperature (℃)	Daily sunshine hour (h)	Realtive humidity	Treatments	Sowing	Wintering	Fiowering	Maturity
20181001	0	22.1	26.4	18.5	5.5	50			20191001	0	25.2	34.4	18.9	10.5	66	28-Oct	2018-10-28	2019-01-06	2019-04-10	2019-05-18
20181002	0	20.8	27.2	15.3	9	73			20191002	0	26.8	32.8	22.8	6.7	48.3	5-Nov	2018-11-05	2019-01-06	2019-04-13	2019-05-20
20181003	0	20.6	25.5	16.9	1.3	68			20191003	0	26.8	34.2	21	8.7	63	13-Nov	2018-11-13	2019-01-06	2019-04-15	2019-05-21
20181004	0	19.9	27.9	14.2	11	69			20191004	0	27.8	33.9	23.5	8.7	59	21-Nov	2018-11-21	2019-01-06	2019-04-19	2019-05-25
20181005	0	19.5	27.2	13.1	10.3	64			20191005	3.1	18.3	25.8	15.4	0	83.8
20181006	0	19.8	28	13.8	9.9	69			20191006	0	14.9	16.2	14	0	88.5
20181007	0	21.3	28.1	17.1	7.6	77			20191007	0	17.2	21.4	14.5	0.2	72.3	2019-2020 Growth period
20181008	2.4	18.8	21.5	16.6	0	82			20191008	0	18.2	19.8	16.6	0	79.5	Treatments	Sowing	Wintering	Fiowering	Maturity
20181009	0.1	18.6	20.9	16.6	0	91			20191009	0	20.9	24.7	17.7	3.2	75.3	28-Oct	2019-10-28	2020-01-06	2020-03-22	2020-05-11
20181010	0	17.2	24.8	11.9	10.1	54			20191010	0.1	19.6	22.9	18.2	0	77.8	5-Nov	2019-11-05	2020-01-06	2020-03-27	2020-05-12
20181011	0	16.5	24.5	9.5	10.4	64			20191011	6.3	19.5	23.1	17.3	0	82.5	13-Nov	2019-11-13	2020-01-06	2020-04-03	2020-05-16
20181012	0	17.8	24.6	12.9	10.3	66			20191012	2.8	18.7	23.2	15.9	0.4	84.8	21-Nov	2019-11-21	2020-01-06	2020-04-07	2020-05-16
20181013	0.4	15.8	18.9	14.1	0	83			20191013	0	20.3	23.7	16.3	2.4	79.5
20181014	1.1	15.4	18.6	13.5	0	88			20191014	1	19	21.9	16.6		85.3
20181015	0	16.2	20.9	13.2	3.2	84			20191015	0.6	15.6	19.3	12.9	0	72.5
20181016	0	16.2	21.1	12.1	3.1	91			20191016	14.9	12.8	15.8	12.3	0.8	96
20181017	0	18.2	24.2	14.3	8.9	77			20191017	0	15.1	20.5	10.8	0	79.8
20181018	0	18.1	23.3	13	7.4	67			20191018	0	15.9	23.8	10.5	5.7	83.8
20181019	5.5	14.7	19.3	12.6	0	80			20191019	0	17.7	25.5	11.7	9.5	79.3
20181020	4.9	13.3	15.2	12.5	0	98			20191020	0	18.6	26	12.6	9.7	78.8
20181021	5.4	13.6	14.8	12.3	0	98			20191021	0	20.6	26.7	15.6	6.7	76.5
20181022	0	16.6	22.6	11.7	8.8	88			20191022	5.5	17.9	22.7	16.5	3.6	90
20181023	0	17.7	24.3	13.3	5.9	79			20191023	0.9	18.3	23.4	16.1	0	82.3
20181024	0.2	18.2	23.7	13.8	3.3	86			20191024	0	20.3	25.2	16.5	4.3	70.8
20181025	0.3	18.8	22	17	0	93			20191025	5.1	14.9	21.4	12.8	3.4	84
20181026	0	18	26.5	12.2	9.5	70			20191026	0	14.2	16.5	13	0	67.8
20181027	0	16.5	24.3	11	9.4	62			20191027	0.1	14.4	19	12.6	0	79.3
20181028	0	17.7	27.6	11	9.9	72			20191028	0	15.5	25	10.4	2.5	84
20181029	0	18.6	28.2	11.4	9.5	67			20191029	0	16.9	25.5	10.5	5.9	76
20181030	0	18	27.5	11.6	9.1	65			20191030	0	17.2	26	11.5	9.5	81.3
20181031	0	16.9	27.4	10.4	9.5	75			20191031	0	17	25.7	11.9	8.7	80
20181101	0	16.7	25.2	10.1	9.3	71			20191101	0	18.3	25.4	13.1	7.5	73
20181102	0	16.7	23.1	12.8	8.7	66			20191102	0	19.8	23.9	14.8	3.9	59.5
20181103	0	14.9	23.2	9.9	9.6	79			20191103	0	18.4	25.6	12.7	2.4	65.3
20181104	0	17.3	23.3	11.7	6.6	69			20191104	0	16.9	22.1	13.1	9	67.5
20181105	2.5	13.6	19	10.7	0	82			20191105	0	16.7	21.7	12.6	6.7	73
20181106	49.5	9	10.8	7.9	0	94			20191106	0.4	16.8	19.6	14.6	6.4	75.3
20181107	9.4	7.3	8.4	6.7	0	97			20191107	0.1	16.9	22.2	14.6	0	73.5
20181108	0	10.7	16.6	6.5	10	89			20191108	0	15	21.6	11	2	73.3
20181109	0	10.4	14.1	7.9	1.2	96			20191109	0	14.6	22.8	9.3	8	78.5
20181110	9.8	12.1	12.8	10.9	0	99			20191110	0.2	18.1	25.5	11.5	8.4	70.5
20181111	3.9	12.6	14.9	11.4	0	99			20191111	0	16.9	22.2	11.1	9.1	71.5
20181112	1.4	12.9	18.2	9.7	6.5	88			20191112	0.5	17.3	19.5	15.8	2	77.5
20181113	0.7	12.4	16.3	8.5	1.7	91			20191113	5.8	16.2	21.2	13.2	0	68.3
20181114	4.6	12.7	13.5	12.4	0	99			20191114	0	13.6	21.3	7.2	0.8	71
20181115	0.4	13.4	15	11.9	0	88			20191115	0	16.8	24.3	10.7	8.8	56.5
20181116	1.4	12.5	14.2	10	0	91			20191116	0	18.3	21.1	16.3	9.2	67
20181117	4.1	7.6	10	6.6	0	99			20191117	1.7	15.1	18.3	11.1	0	74.5
20181118	4.9	8.5	13.5	6.6	0	90			20191118	2.4	9.7	14.8	7.8	0	71.3
20181119	0	9.3	14.9	3.9	5.9	81			20191119	0	9.6	15.9	4.9	1.4	69.8
20181120	0	11	14.1	6.7	1.6	86			20191120	0.1	12.6	16.7	10	4.1	54.8
20181121	0	13	16.8	11.2	6.2	64			20191121	0.8	12.4	16.4	10.3	3	69
20181122	0	9.4	15.7	3.4	6	70			20191122	0	14.1	19.8	8.2	0.6	73.8
20181123	0	12.3	18.5	6	8.8	68			20191123	0	17	22.1	14.4	7.2	75.8
20181124	0	11.4	16.9	6.5	6.4	86			20191124	3	13.6	17.6	8.7	5.2	75.8
20181125	0	12.6	19.9	8.6	8.2	88			20191125	4.6	4.8	8.8	3.3	0	81.8
20181126	0	12.1	20.1	6.7	7.4	88			20191126	7.1	3.9	5.4	3.1	0	87.8
20181127	0	12.1	19.4	6.7	7.9	89			20191127	9	4.9	6.3	3.1	0	92
20181128	0	13.8	19.7	9.2	7.4	84			20191128	0	6.4	9.1	2.9	0	69.5
20181129	0	13.1	19.6	9	6.8	85			20191129	0.4	6.3	7.2	5.9	0.9	87
20181130	0	11.8	15	9.8	2.8	84			20191130	1.1	5.6	6.3	4.7	0	91.5
20181201	0.3	12	15.3	8.8	0	82			20191201	0	6.7	12.1	4.8	0	84.8
20181202	0.4	12.5	14.1	11.3	0	96			20191202	0.1	6.6	15	1.7	8.2	73.3
20181203	16.4	11.4	13.1	11	0	98			20191203	0	6.8	15.2	0.9	7.9	78
20181204	0	9.9	11.9	8.5	0	61			20191204	0	8.8	17.2	5	7.9	79
20181205	10.1	6.9	9.6	4.9	0	82			20191205	0	8.5	15.4	3.6	3.3	72.8
20181206	2.6	5.5	6.3	4.6	0	85			20191206	0	6.8	12.8	3.8	8	61
20181207	1	3.1	6.5	2.2	0	92			20191207	0	6.1	14	1	6.9	82
20181208	0	2.3	3	1.5	0	56			20191208	0	7.1	15.1	1.6	7.1	84.5
20181209	0	2	2.9	1.1	0	61			20191209	0	9.4	17	3.7	4.4	86
20181210	0	1.9	2.6	1.1	0	72			20191210	0	9.4	18.8	3.3	5.2	85.3
20181211	0	3.1	8.6	-1.4	5.9	73			20191211	0	9	18	2.7	6.9	84.3
20181212	0	1.7	7.6	-2.6	7.4	68			20191212	0	9.3	16.6	4.7	7.1	75
20181213	0	3.6	9.8	-1.8	7	67			20191213	0	8.7	16.3	4.6	5	76.5
20181214	0	4.7	6.1	3.4	0	60			20191214	0	9.9	13.3	8	0	65.3
20181215	0	5.8	7.7	4.7	0	58			20191215	0	7.8	10.1	6.5	0	63.8
20181216	0	6.8	15.2	0	7.8	79			20191216	0	8	9.6	6.7	0	77.8
20181217	0	8.9	16.4	1.7	8.2	76			20191217	0.8	9.3	11.1	7.9	0	74
20181218	0	8.6	15.9	2.4	5.2	83			20191218	1.4	6.7	9.6	4.6	0	70.8
20181219	0.5	9.6	10.8	9	0	90			20191219	0	5.6	10.9	2.7	1.4	80
20181220	0	10.2	12.9	8.3	0	96			20191220	0	7.3	11.3	4.8	1.6	76.5
20181221	1.2	10.7	12.3	9.9	0	96			20191221	0.5	7.5	8.9	6.8	0	88.8
20181222	4.8	8.5	10.1	7.9	0	90			20191222	0.4	7.6	12.1	3.2	6	85
20181223	0	8.9	11.7	7.3	0	62			20191223	0	8	9.6	7.1	0	82.3
20181224	0.6	6.9	8.8	5.8	0	73			20191224	0	7.4	9.1	6.2	0	83.8
20181225	1.2	4.9	5.9	4.3	0	94			20191225	4.1	6.7	7.8	6.3	0	97.8
20181226	0.4	4.9	5.7	3.6	0	86			20191226	0	7.5	11.8	4.5	6.2	64
20181227	1	2.8	4.3	0.6	0	84			20191227	0	5.9	12.1	0.2	6.1	73.8
20181228	1.4	-0.5	0.6	-1.2	0	81			20191228	0.1	7.3	9.6	4.6	0	73
20181229	0	-0.2	1.4	-1.4	0	49			20191229	0	7.5	10.2	6.7	0.1	95.3
20181230	6.3	-2.3	0.7	-3.1	1.6	92			20191230	0	8.7	12.3	6	2.5	78
20181231	0	-2.4	3.2	-5.9	6.2	90			20191231	0	3.9	8.2	1.1	3.2	52.5
20190101	0	-0.4	2.3	-3.2	0	85			20200101	0	4.2	5.3	3	0	69
20190102	0	2.3	4.2	0.7	0	77			20200102	0.1	4.9	6.4	2.5	0	69.8
20190103	0	3.4	4.9	2.3	0	86			20200103	0.2	5.6	6.4	5	0	81
20190104	0.2	4.5	5.6	3.1	0	82			20200104	0	6.4	8.8	3.1	0	84.5
20190105	0	3.4	5.2	0.6	0	80			20200105	4.3	6.5	7.4	5.7	0	98.8
20190106	0	2.7	4.8	-0.7	0	87			20200106	17.7	5	7.7	4.5	0	99
20190107	0	4.5	5.5	3.8	0	73			20200107	20.1	5	8.9	3.3	0.8	91.3
20190108	6	1.5	4.9	0	0	92			20200108	12.1	4	5.2	2.9	0	94
20190109	9.1	0.9	1.6	0.3	0	99			20200109	49.3	2.2	3.3	1	0	94
20190110	0.1	1.3	2.7	0.1	0	88			20200110	4.8	2.8	3.5	2.1	0	91.3
20190111	0.5	2.4	5.4	1.3	0	96			20200111	0	4.8	10	2	4.2	83.5
20190112	0.3	1.6	2.7	-1.3	0	99			20200112	0	7.3	11.5	2.6	6.8	76.3
20190113	0	4.6	7	2.5	0	95			20200113	0	6.9	9.8	5.4	0.3	70.8
20190114	1.4	5.5	6.3	4.7	0	92			20200114	0	6	8.2	3.2	0.1	73
20190115	0	3.7	6.8	2.6	0	78			20200115	5.7	3	7.1	1.6	0	84
20190116	0	1.7	6.8	-1.8	60	60			20200116	0	2.7	6.8	0.8	2.3	76.5
20190117	0	2.8	9	-2.3	77	85			20200117	0	2.5	7.9	-1.2	3.1	84.8
20190118	0	4.3	6.7	0.9	2	96			20200118	0	3.7	4.6	2.2	0	86.5
20190119	0	5.3	6.6	4.4	0	91			20200119	0	5.1	12.3	0.7	6.1	83.8
20190120	0	5.9	9.4	4.4	0	66			20200120	0	5.5	11.2	0.5	2.9	80.5
20190121	0	5.8	10.7	2.4	40	54			20200121	0.9	7.4	9.7	6.2	0	87.5
20190122	0	6.4	15.7	-1.4	88	73			20200122	12.3	7.1	8.5	5.3	0	88.8
20190123	0	7.1	15.6	0.8	89	75			20200123	0.1	6.4	7.8	5.3	0	88.5
20190124	0	7.3	12.4	1.9	0	78			20200124	8.9	5.8	7.3	4.2	0	94.3
20190125	0	10.1	12.6	8.4	0	53			20200125	3.3	4.4	5.5	3.9	0	90.8
20190126	0	6.2	8.4	5.3	0	53			20200126	0.2	4.2	5.5	3.4	0	81
20190127	0	5.4	6.6	4.9	0	63			20200127	0	4	7.5	1.2	4.2	75.3
20190128	0.1	5.7	7.2	4.6	0	76			20200128	0	2.9	10.3	-1.2	7	85
20190129	0.9	4.4	6.4	3.7	0	92			20200129	0	6	13.5	-0.2	8.9	78.8
20190130	5.9	4.7	5	4	0	99			20200130	0	6.3	15	0.5	9.2	77.5
20190131	12	3.5	6.5	1.6	11	89			20200131	0	7.4	15.2	1.5	8.5	72.8
20190201	0.2	3.5	7	-0.6	14	89			20200201	0	8.2	11.6	5.9	0	79.3
20190202	0	7.7	10	6.1	0	83			20200202	0.3	8.8	10.6	7.6	0	90.3
20190203	0	9.1	12.8	7.4	0	70			20200203	0	8.5	14.6	5	7.2	79.5
20190204	0	8.3	13	5.3	15	68			20200204	0	7.7	15.5	2.7	8.3	81.5
20190205	0	7.4	15.3	1.6	85	85			20200205	0	8	13.7	3.9	6	79.3
20190206	0	8.9	10.4	8.2	0	95			20200206	14.4	2.8	9.5	1.7	0	93.5
20190207	3.6	4.6	9.4	0.1	0	78			20200207	0	3.7	7	1.9	1.3	84.8
20190208	1	-0.5	0.4	-1.1	0	98			20200208	0	6.5	11.8	2	6.7	79.8
20190209	0	-0.4	0.4	-1.1	0	96			20200209	0	7.3	14.3	1.5	9.3	79
20190210	0.4	-1.6	0	-2.1	0	92			20200210	0.3	9.8	12	8.5	0.1	79.5
20190211	0	0.4	3	-2.1	0	86			20200211	0	10.6	13.6	8.9	0.9	90.3
20190212	2	1.9	3.8	1.2	0	99			20200212	0	11.3	13.1	10	0	94
20190213	0.2	1.6	2.5	0	0	99			20200213	0	12.3	17.3	10.4	3.1	94.8
20190214	0.1	1.8	2.4	1.4	0	98			20200214	0	13.5	17.3	11.7	0	83
20190215	3.4	2.8	4.9	1.3	0	93			20200215	13.5	2.8	11.6	0.2	0	90
20190216	0.8	3.3	4.5	2.3	0	90			20200216	2.6	4.2	10	0.2	8.6	74.3
20190217	0.8	2.4	4.1	1.7	0	71			20200217	0	5.9	13.3	0.3	9.8	67.8
20190218	4.1	0.6	1.8	-0.4	0	95			20200218	0	7.4	13.2	1	4	68.3
20190219	0	0.9	4.3	-3.1	0	89			20200219	0	10	15.3	6.4	4.1	64.3
20190220	3.3	4.5	6.5	2.6	0	89			20200220	0	10.2	17	3	9.3	72.3
20190221	3.7	4.3	5.6	3.3	0	95			20200221	1.3	12.2	16.8	9.4	4.4	72.8
20190222	0	5	10.2	0.2	77	82			20200222	0	11.3	17.8	5.1	6.5	79
20190223	0	7.3	9.9	5.1	0	78			20200223	0	13.7	17	11.8	0	77
20190224	0	7.8	11.2	4.2	0	80			20200224	0	16.1	20.3	13	0	82.5
20190225	0	9.3	13	6.4	0	77			20200225	3.2	16.5	21.3	13	1	84.3
20190226	0	7.5	10.6	5.4	0	96			20200226	8.1	12.3	16.5	11	0	88
20190227	3.7	6.8	8.7	5.2	0	91			20200227	2.1	9.5	12.1	8.3	0	96.5
20190228	0	6.8	11.6	1.5	0	84			20200228	5.6	6.3	8.4	5.1	0	96.5
20190301	2.5	7.9	9	6.9	0	97			20200229	0.4	7.4	11.2	4.7	0.5	94.3
20190302	8.1	7.3	10.2	6.6	0.6	94			20200301	0	8.2	11.8	4.6	1.4	95.3
20190303	0	9	14.6	4.9	9.3	86			20200302	3.1	8.1	10.5	7.3	0	86.3
20190304	6.4	10.2	15.6	4.6	4.4	89			20200303	0.1	7.4	11.1	4.7	0	89.8
20190305	5.8	10.8	12.5	9.2	0	96			20200304	0	10.5	15.3	7	6.4	76.3
20190306	0	11.9	17.6	7	7	80			20200305	0	11.1	15.9	6.2	5.9	78.8
20190307	0	11	14.2	7.4	3.7	54			20200306	0	12.4	14.4	11	0	88.5
20190308	0	8.5	11.3	6.6	0	56			20200307	0	12.4	17.3	8.5	1.9	88
20190309	0	9.4	15.5	3.4	5.7	77			20200308	16.1	13.8	15.4	13.3	0	96.5
20190310	0	11.2	20	4.7	9.6	71			20200309	6	13.2	14.5	11.1	0	82.5
20190311	0	13.3	21.4	8	9.2	69			20200310	0	12.3	18.1	6.5	7.4	72.5
20190312	0	14	22.5	7.5	9.7	60			20200311	0	12.3	16.5	7.9	1.4	76
20190313	5.9	11.2	14.7	9.9	0	84			20200312	0	14.4	19.4	11.1	7	81.3
20190314	0.9	13.1	19.6	8.4	10.1	78			20200313	0	13	18	11.2	3.3	72.8
20190315	0	14.2	22.1	9.2	9.5	75			20200314	0	12.9	20.2	5.9	10.3	59.3
20190316	0	15.5	21.3	12.4	4	66			20200315	0	13.5	20	6.7	4.1	71.5
20190317	0	12.5	15.4	9.9	0	94			20200316	0	14.8	17.7	12.1	0	75.5
20190318	0	13.7	21	8.7	9.2	80			20200317	0	16.2	23.5	10.3	8.2	65.3
20190319	0.2	15.4	20.2	10.7	2.2	88			20200318	0	16.4	24.1	9.8	10.7	71.8
20190320	3.3	18.6	26.2	13.2	9.8	86			20200319	0	16.5	24.8	10.6	10	68.8
20190321	2	13.7	20.8	8	0	88			20200320	0	18.1	26.7	10.8	10.1	72
20190322	5.7	8	9.3	6.7	0	83			20200321	0	19.8	26.3	14.9	3.1	79.5
20190323	0	10	15.4	6	3.2	81			20200322	5.6	18.9	22.3	17.3	0.5	65.5
20190324	0	10.6	13.3	7.8	0	85			20200323	0.6	16.7	20.1	14.8	0	78
20190325	0	12.4	20.5	5.9	9.8	78			20200324	0	17.7	21.5	14.4	0	85.8
20190326	0	14.4	19.8	9.2	4.2	83			20200325	10.3	19.1	22.8	17.4	1.7	95.5
20190327	0	17.2	22.3	12.3	5.8	89			20200326	4.4	19.5	21.2	18.3	0	96.5
20190328	2.1	17.4	22.4	15.2	2.4	89			20200327	29.1	7.9	19.1	4.2	0	84.5
20190329	0	16.5	22.5	12.8	5.2	92			20200328	2.8	7.3	10.2	4.3	0	82.3
20190330	0	14.3	17.5	11.9	0	78			20200329	14.8	6.7	8.3	5.2	0	91.5
20190331	8.1	13.3	19.1	9.2	4.7	80			20200330	0	8.5	11.5	5.2	1.3	81.8
20190401	0	14.1	21.2	8	7.6	79			20200331	0	10.6	15.2	8.7	2.3	83.3
20190402	6.4	13.4	16.4	11.9	0	99			20200401	0	12.3	17.1	7.5	2.6	82.5
20190403	0.2	14.5	19.7	11.9	0	92			20200402	0	13.2	16.2	11.3	0.4	78.5
20190404	0	14.9	20.4	11.1	0.1	85			20200403	0	14.1	17.7	12	0.1	70.5
20190405	0	17.2	25	10.8	8.2	80			20200404	0	15	20.2	9.4	4.2	69.3
20190406	0	20.8	28.3	13.5	5.4	78			20200405	0	16.2	19.6	13.6	0	67.5
20190407	0	21.9	29.9	14	0.1	78			20200406	0	16.6	22.1	12.9	3	70.3
20190408	0	25.3	31.2	16.8	1.1	66			20200407	0	16.2	23.5	10.2	9.7	68.3
20190409	19.1	15	28	10.3	0	87			20200408	0	16.8	24.1	10.2	7.7	75
20190410	5	9.8	11.9	8.7	0	84			20200409	0	19.5	26.3	12.1	10.7	69.8
20190411	5.3	12.9	19.3	8.7	0	81			20200410	18.4	12.8	22.8	9.1	0	90.3
20190412	0	14.7	20.3	8.7	0.1	81			20200411	2.3	10	15.2	7.1	4.4	75.8
20190413	0	16.7	21.5	12.6	0	82			20200412	0	13.6	23.2	6.3	11.4	66.5
20190414	5.5	17	20.5	14.4	0	73			20200413	0	16.5	24.7	8	10.2	56
20190415	0	15.2	22	9.9	0.1	78			20200414	0	18.8	24.9	15	4.8	52
20190416	0	17.8	25.9	10.8	0.2	78			20200415	0.8	19.3	27	11.7	11	71.5
20190417	0	21.3	28.3	15	9.7	76			20200416	0	22.7	30.5	15.5	10.5	68.5
20190418	0	23.7	29.8	18.3	7.3	66			20200417	0	21.7	25.1	20.3	1.8	50.8
20190419	0	23	26.1	20.5	3.5	77			20200418	10.8	13.5	20.3	12.7	0	95
20190420	1	17.9	21	16	0	74			20200419	10.1	15.7	21.4	11.5	8.5	78.5
20190421	15.5	18	21.7	15.4	0.7	90			20200420	30.6	15.4	16.8	13.6	0	96.8
20190422	0.1	19	22.8	16.2	0.7	82			20200421	0.9	14.6	16.3	13.2	0	88.5
20190423	0	20.5	25	16.9	0.8	83			20200422	0	16	49.8	13.8	0	71.3
20190424	0	22.7	26.8	19.2	2.5	84			20200423	0.1	16.5	20.9	13.7	0.4	60.5
20190425	0	24	30	19.4	4.5	85			20200424	0	18	24.7	10.8	9.5	65.8
20190426	0	17.3	24.7	14.3	0	83			20200425	0	19.9	27.7	12.2	8.6	56.3
20190427	0	13.7	15.1	12.8	0	78			20200426	0	21.2	29.2	13.4	11.7	69
20190428	15	12.2	14.4	10.9	0	87			20200427	0	21.7	26.9	14.7	11.4	59
20190429	11.1	14.2	18.9	11.1	0.2	87			20200428	0	20.3	26.2	13.7	11.4	55.8
20190430	0	18.1	25	11	5	82			20200429	0	23.4	32.1	16	11.4	72.3
20190501	0	20.9	26	16.2	9.6	70			20200430	0.4	22.4	27.1	20.4	0	86
20190502	0	20.8	26.5	15.4	8.4	58			20200501	0	23.8	30.7	17.7	10.9	78.5
20190503	0	20.9	26.6	15	7.1	74			20200502	0	26.7	33.3	20.6	10.6	74.8
20190504	0	23.5	28.4	19.1	5.6	68			20200503	0	27.5	33.9	19.8	11.7	72
20190505	11.2	20.7	24.7	19.8	0	94			20200504	0	28	33.2	23.2	4.7	79.8
20190506	4.2	17.9	20.1	15.2	0	84			20200505	9.9	21.4	30	17.1	3.3	81
20190507	4.8	15.3	17	13.4	0	76			20200506	0	20.5	23.4	18.7	0	84
20190508	0	17.9	23.9	11.7	9	66			20200507	3	19	19.8	18.1	0	99
20190509	0	18.5	24.6	13.5	2.4	78			20200508	58	21.1	25.6	18.2	0.5	88.8
20190510	0	21.3	29.3	14	10.6	73			20200509	1.8	20.3	23.9	18.9	2.9	89
20190511	0	23.8	31.1	16.9	10.4	70			20200510	0	21.7	27.6	15.9	9.7	65.3
20190512	0.5	22.5	27.3	19.1	0.7	85			20200511	0	20.7	26.5	16.1	3.1	65
20190513	0.8	21.1	23.1	18.5	0	65			20200512	0	22.5	30.2	13.9	10.9	58.3
20190514	9.3	16.8	20.7	15.1	0	92			20200513	1	21.6	26.2	19.4	0	72
20190515	2.8	18.7	24.8	15.2	3.1	91			20200514	13.4	19.5	23.4	17.3	1.2	91.8
20190516	0.9	20.9	24.7	17.3	1.7	96			20200515	0	21.5	27.1	17.7	4.2	89
20190517	2.8	24.2	30.2	19.8	8	84			20200516	0	23.3	29.1	19.3	1.9	89
20190518	0.3	24.6	28.3	20.5	0.2	89			20200517	0	24.9	30.9	20.7	4.9	88.5
20190519	24.1	22.6	25.6	20.1	0	82			20200518	0	24.9	29.6	22.5	10.4	62.5
20190520	0	21.6	24.1	19.1	0.1	50			20200519	0	25	31.5	17.3	9.1	49.8
20190521	0	18.9	22.1	16.1	0	82			20200520	6.9	20.9	27.1	19.3	0	94.5
20190522	0	21.9	31.1	14.4	0	75			20200521	0	21.7	24.7	19.6	0.2	87.8
20190523	0	23.6	32	15.9	12.1	70			20200522	0	24.6	32.6	18.1	9.7	75
20190524	0.6	25.2	31.8	18.9	7.3	79			20200523	0	27	33.7	20.7	11.1	71.8
20190525	93.9	23	26.6	22.2	0	99			20200524	0	25.7	29.7	22	2.3	62.5
20190526	6.8	25.5	30.5	22.2	5.7	88			20200525	3.7	20.1	25.5	18.4	0	84.5
20190527	0	26.4	29.6	23.4	3.5	67			20200526	0.2	22.7	29.7	16.9	4.7	77.5
20190528	0	22.1	26.8	18.8	4.2	53			20200527	0	25.9	33.3	22	5.7	70.5
20190529	0.6	18.3	21	16.1	0	76			20200528	0	24.6	28.4	22.3	0.1	74.3
20190530	5.9	18.7	21.7	16	0.2	92			20200529	0	23.2	25.6	21.6	0.8	89.5
									20200530	0	24.5	29.2	20.8	4	82
									20200531	0	25.9	30.4	21.2	3.3	85.5

## Sheet: Part 2
2018-2019 Tillers number at jointing stage (104 ha-1)						2019-2020 Tillers number at jointing stage (104 ha-1)
Treatments	Repeat 1	Repeat 2	Repeat 3			Treatments	Repeat 1	Repeat 2	Repeat 3
28-Oct	540	572	480			28-Oct	539	512	521
5-Nov	624	636	648			5-Nov	644	633	650
13-Nov	592	588	608			13-Nov	668	660	652
21-Nov	692	588	640			21-Nov	710	698	696
2018-2019 Tillers number at maturity stage (104 ha-1)						2019-2020 Tillers number at maturity stage (104 ha-1)
Treatments	Repeat 1	Repeat 2	Repeat 3			Treatments	Repeat 1	Repeat 2	Repeat 3
28-Oct	445	447	440			28-Oct	428	433	435
5-Nov	485	481	487			5-Nov	463	473	464
13-Nov	434	432	447			13-Nov	413	412	410
21-Nov	364	378	373			21-Nov	395	388	391
2018-2019 Peak tillers (104 ha-1)						2019-2020 Peak tillers (104 ha-1)
Treatments	Repeat 1	Repeat 2	Repeat 3			Treatments	Repeat 1	Repeat 2	Repeat 3
28-Oct	756	836	764			28-Oct	1092	1088	1056
5-Nov	724	776	764			5-Nov	936	888	804
13-Nov	592	588	608			13-Nov	668	660	652
21-Nov	692	588	640			21-Nov	710	698	696

## Sheet: Part 3
2018-2019 Grain yield (kg ha-1)						2018-2019 Spike number (104 ha-1)					2018-2019 Kernel number per spike					2018-2019 1000-kernel weight (g)
Treatments	Repeat 1	Repeat 2	Repeat 3	Repeat 4		Treatments	Repeat 1	Repeat 2	Repeat 3		Treatments	Repeat 1	Repeat 2	Repeat 3		Treatments	Repeat 1	Repeat 2	Repeat 3	Repeat 4
28-Oct	6440	6385	6566	6224		28-Oct	445	447	440		28-Oct	41.381	39.9524	41.0476		28-Oct	39.58	41.14	40.3	41.1
5-Nov	6547	6549.5	6506	6713		5-Nov	485	481	487		5-Nov	38.4583	36.4167	38.5		5-Nov	40.38	41.12	40.1	40.8
13-Nov	5501.5	5764.5	5758.5			13-Nov	444	432	437		13-Nov	37.6364	37.4652	38.6522		13-Nov	40.52	41.1	41.48	40.52
21-Nov	5415	5660	5634			21-Nov	364	378	373		21-Nov	40.3182	40.75	41.7917		21-Nov	41.1	40.68	40.22	42.32
2019-2020 Grain yield (kg ha-1)						2019-2020 Spike number (104 ha-1)					2019-2020 Kernel number per spike					2019-2020 1000-kernel weight (g)
Treatments	Repeat 1	Repeat 2	Repeat 3			Treatments	Repeat 1	Repeat 2	Repeat 3		Treatments	Repeat 1	Repeat 2	Repeat 3		Treatments	Repeat 1	Repeat 2	Repeat 3
28-Oct	6955	6960	7025			28-Oct	428	433	435		28-Oct	40.9333	40.8	40.87		28-Oct	46.98	46.72	46.9
5-Nov	7255	7345	7125			5-Nov	463	473	464		5-Nov	39.0667	39.8	37.73		5-Nov	46.62	48.16	46.94
13-Nov	5925	6020	5930			13-Nov	408	412	415		13-Nov	40.47	40.1333	40.82		13-Nov	47.62	47.52	48.06
21-Nov	5540	5665	5670			21-Nov	395	388	391		21-Nov	42.2	41.87	42		21-Nov	46.66	49.04	48.7

## Sheet: Part 4
2018-2019 Dry matter accumulation per stem (g)-Wintering					2019-2020 Dry matter accumulation per stem (g)-Wintering					2018-2019 N accumulation per stem (mg)-Wintering					2019-2020 N accumulation per stem (mg)-Wintering
Treatments	Repeat 1	Repeat 2	Repeat 3		Treatments	Repeat 1	Repeat 2	Repeat 3		Treatments	Repeat 1	Repeat 2	Repeat 3		Treatments	Repeat 1	Repeat 2	Repeat 3
28-Oct	0.1225	0.135	0.117813		28-Oct	0.123333	0.1345	0.105085		28-Oct	5.6284	5.72112	5.90402		28-Oct	6.18863	6.17218	6.20084
5-Nov	0.112258	0.108	0.131724		5-Nov	0.0712069	0.0627273	0.0769811		5-Nov	3.77	3.74	3.53		5-Nov	3.85921	4.02099	3.60301
13-Nov	0.07875	0.0565217	0.0819048		13-Nov	0.0481395	0.05225	0.0404545		13-Nov	3.40285	3.51187	3.29261		13-Nov	2.60524	2.6242	3.036
21-Nov	0.0394118	0.0321429	0.0378571		21-Nov	0.0408	0.0541176	0.0352174		21-Nov	1.65019	1.59079	1.50596		21-Nov	2.59025	2.51671	2.55
2018-2019 Dry matter accumulation per stem (g)-Jointing					2019-2020 Dry matter accumulation per stem (g)-Jointing					2018-2019 N accumulation per stem (mg)-Jointing					2019-2020 N accumulation per stem (mg)-Jointing
Treatments	Repeat 1	Repeat 2	Repeat 3		Treatments	Repeat 1	Repeat 2	Repeat 3		Treatments	Repeat 1	Repeat 2	Repeat 3		Treatments	Repeat 1	Repeat 2	Repeat 3
28-Oct	0.51	0.43	0.45		28-Oct	0.56	0.55	0.52		28-Oct	11.6919	11.6787	11.7437		28-Oct	17.53	17.4	17.34
5-Nov	0.425926	0.415556	0.385714		5-Nov	0.43	0.48	0.47		5-Nov	9.53943	9.90619	9.74408		5-Nov	13.24	12.74	12.65
13-Nov	0.570588	0.45	0.52		13-Nov	0.59	0.56	0.58		13-Nov	10.3849	10.3278	10.3271		13-Nov	14.87	14.56	14.44
21-Nov	0.678378	0.547368	0.6525		21-Nov	0.63	0.63	0.59		21-Nov	12.3756	12.0208	12.3353		21-Nov	14.66	14.41	14.6
2018-2019 Dry matter accumulation per stem (g)-Booting					2019-2020 Dry matter accumulation per stem (g)-Booting					2018-2019 N accumulation per stem (mg)-Booting					2019-2020 N accumulation per stem (mg)-Booting
Treatments	Repeat 1	Repeat 2	Repeat 3		Treatments	Repeat 1	Repeat 2	Repeat 3		Treatments	Repeat 1	Repeat 2	Repeat 3		Treatments	Repeat 1	Repeat 2	Repeat 3
28-Oct	1.37742	1.62857	1.25313		28-Oct	1.72	1.71	1.68		28-Oct	29.0382	31.4426	32.1144		28-Oct	33.34	33.26	33.28
5-Nov	1.42258	1.29643	1.41034		5-Nov	1.51	1.49	1.48		5-Nov	29.2588	31.7974	29.7864		5-Nov	32.94	32.84	33.02
13-Nov	1.24118	1.28205	1.3125		13-Nov	1.43	1.45	1.44		13-Nov	28.1036	28.8583	26.3873		13-Nov	34.38	34.42	34.36
21-Nov	1.25682	1.23556	1.29744		21-Nov	1.33	1.36	1.36		21-Nov	30.6445	33.0773	31.7734		21-Nov	34.87	34.96	34.89
2018-2019 Dry matter accumulation per stem (g)-Flowering					2019-2020 Dry matter accumulation per stem (g)-Flowering					2018-2019 N accumulation per stem (mg)-Flowering					2019-2020 N accumulation per stem (mg)-Flowering
Treatments	Repeat 1	Repeat 2	Repeat 3		Treatments	Repeat 1	Repeat 2	Repeat 3		Treatments	Repeat 1	Repeat 2	Repeat 3		Treatments	Repeat 1	Repeat 2	Repeat 3
28-Oct	2.84038	3.036	2.30638		28-Oct	2.19864	2.33037	2.07229		28-Oct	39.9361	39.7821	39.7484		28-Oct	39.6835	38.54	38.4
5-Nov	2.95901	2.62762	2.28194		5-Nov	1.83038	1.78433	2.1531		5-Nov	36.6875	34.7925	34.4284		5-Nov	34.5172	34.71	33.78
13-Nov	1.81196	1.70583	1.81411		13-Nov	1.76586	1.78458	2.00184		13-Nov	35.65	36.11	35.3		13-Nov	36.25	35.73	35.72
21-Nov	2.08537	1.84788	1.87898		21-Nov	1.82132	1.83486	1.65974		21-Nov	39.6431	39.4921	40.7279		21-Nov	40.02	38.07	38.62
2018-2019 Dry matter accumulation per stem (g)-Maturity					2019-2020 Dry matter accumulation per stem (g)-Maturity					2018-2019 N accumulation per stem (mg)-Maturity					2019-2020 N accumulation per stem (mg)-Maturity
Treatments	Repeat 1	Repeat 2	Repeat 3		Treatments	Repeat 1	Repeat 2	Repeat 3		Treatments	Repeat 1	Repeat 2	Repeat 3		Treatments	Repeat 1	Repeat 2	Repeat 3
28-Oct	3.44118	3.95213	3.26219		28-Oct	3.19831	3.23	3.14		28-Oct	42.586	44.1344	44.3408		28-Oct	44.48	44.43	44.4954
5-Nov	2.90439	3.00044	3.19727		5-Nov	3.14	3.22	3.13598		5-Nov	44.31	45.77	45		5-Nov	52.07	51.1186	51.82
13-Nov	2.90112	3.48886	3.6001		13-Nov	2.96	3.03	3.04		13-Nov	45.64	46.38	46.6		13-Nov	52.52	51.83	51.1322
21-Nov	3.62331	3.58706	3.69298		21-Nov	3.07	3.06	3.09		21-Nov	51.1669	49.6427	50.2507		21-Nov	54.1073	54.85	54.27

## Sheet: Part 5
2018-2019 Biomass production (kg ha-1)					2018-2019 N production (kg ha-1)
Treatments	Repeat 1	Repeat 2	Repeat 3		Treatments	Repeat 1	Repeat 2	Repeat 3
28-Oct	15278.8	17547.4	14484.1		28-Oct	189.082	195.957	196.873
5-Nov	14066.8	14532	15485.3		5-Nov	215.197	220.591	218.503
13-Nov	12697.3	15269.7	15756.5		13-Nov	203.541	202.429	200.782
21-Nov	13466.8	13332	13725.7		21-Nov	188.718	189.24	183.472
2019-2020 Biomass production (kg ha-1)					2019-2020 N production (kg ha-1)
Treatments	Repeat 1	Repeat 2	Repeat 3		Treatments	Repeat 1	Repeat 2	Repeat 3
28-Oct	13816.7	14395.3	13148.8		28-Oct	187.85	196.24	192.22
5-Nov	13732.7	15940.3	14634.6		5-Nov	247.662	238.553	237.168
13-Nov	13407.4	13698.8	10036.8		13-Nov	220.322	209.249	210.494
21-Nov	11617.6	12759.1	11704		21-Nov	211.74	210.719	216.307
